# Supplementary material
Source: PubMed Central journal article supplement (PMC1544150)

**A**

Antibody: Anti-pERK

Cell lysates: + +

Serum: + -

ERK1 (44 KD) →

ERK2 (42 KD) →

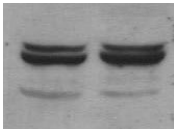**B**

Anti-pJNK

+ +

+ -

p-JNK (46 KD) →

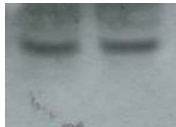

Supplement: pnas_0601515103_1.pdf [file pnas_0601515103_1.pdf]

# MAO A catalytic activity ( Percent Control )

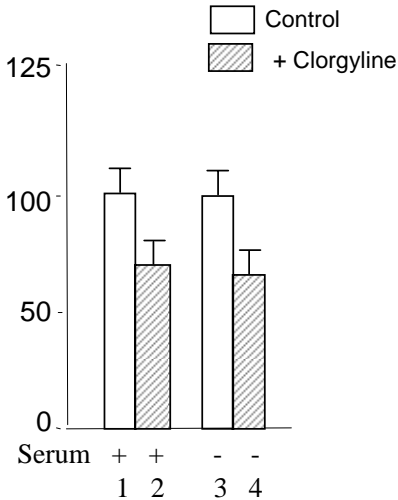

Supplement: pnas_0601515103_2.pdf [file pnas_0601515103_2.pdf]

**A.**

MAO A/B double KO

**B.**

MAO B KO

Serum  
Starvation  
Day 7

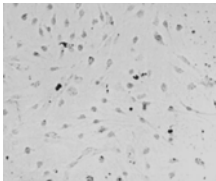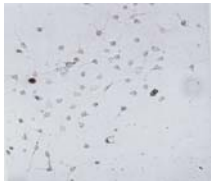

Serum  
Starvation  
Day 14

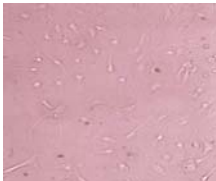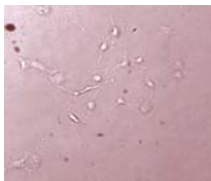

Supplement: pnas_0601515103_3.pdf [file pnas_0601515103_3.pdf]

**A**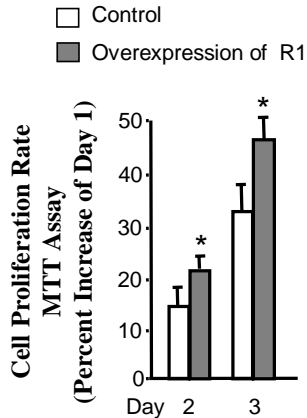**B**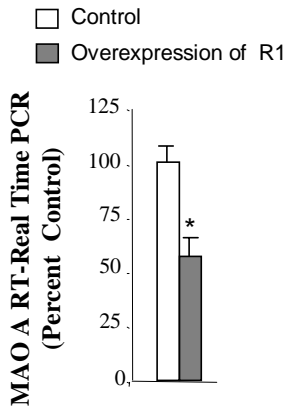**C**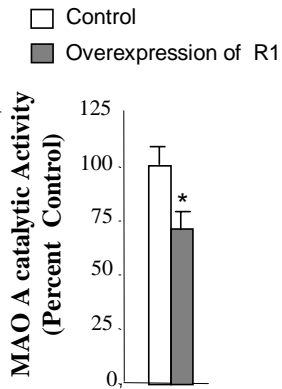

Supplement: pnas_0601515103_4.pdf [file pnas_0601515103_4.pdf]
